# Supplementary material
Source: PubMed Central journal article supplement (PMC2876445)
Supplement: supp_76_11_3413__1.pdf [file supp_76_11_3413__1.pdf]

Table S1. Oligonucleotides (5'→3') used in this study

| Primer name                                                              | Sequence                       | Reference  |
|--------------------------------------------------------------------------|--------------------------------|------------|
| <u>Oligonucleotides (5'→3') used to amplify <i>etnE</i> sequences</u>    |                                |            |
| CoM-F1L                                                                  | AACTACCCSAAYCCSCGCTGGTACGAC    | (1, 2)     |
| CoM-R2E                                                                  | GTCGGCAGTTTCGGTGATCGTGCTCTTGAC | (1, 2)     |
| JS623RTAkMOF                                                             | TCACTTCTGGCACCAACATC           | This study |
| JS623RTAkMOR                                                             | GACGACCCACTCTTCCCATA           | This study |
| JS623WEtnEF                                                              | TAGCCTGGCAGCTGGACTAT           | This study |
| JS623WEtnER                                                              | CAGTCGCGACATCACAGATT           | This study |
| JS623PMDf                                                                | GGCGTTCAAAGAGGACTTCA           | This study |
| JS623PMDR                                                                | TTCGGTGATCGTTGATTTGA           | This study |
| <u>Oligonucleotides (5'→3') used for primer walking on fosmid clones</u> |                                |            |
| JS623EtnAF                                                               | TTTGGGAACCAATCGAAGAT           | This study |
| JS623EtnBR                                                               | AACTGGCATGACTGGAGAGC           | This study |
| JS623EtnDF                                                               | CGGATTTAGCGGTGGATGTA           | This study |
| JS6231F                                                                  | CGTGGACGAAGGAACTGATA           | This study |
| JS6232F                                                                  | CGTGA ACTGGAAAACGAACA          | This study |
| JS6233R                                                                  | TCGCTGAGTTCGTTTCATGTC          | This study |
| JS6234F                                                                  | ACAGTCTGGCGACTCAAC             | This study |
| pCC1FOS5F                                                                | GGATGTGCTGCAAGGCGATTAAGTTGG    | Epicentre  |
| pCC1FOS5R                                                                | CTCGTATGTTGTGTGGAATTGTGAGC     | Epicentre  |



*Mycobacterium* JS623, JS624, JS625, JS619, JS617, JS616, JS622, JS61, JS621, and JS60, *Pseudomonas* AJ, *Ochrobactrum* TD, *Xanthobacter* Py2, *Mycobacterium leprae* (Mlepr), *E.coli*, and *Thermotoga*). Other abbreviations: wt: wild-type, a-e identify JS623 EtnE variants.

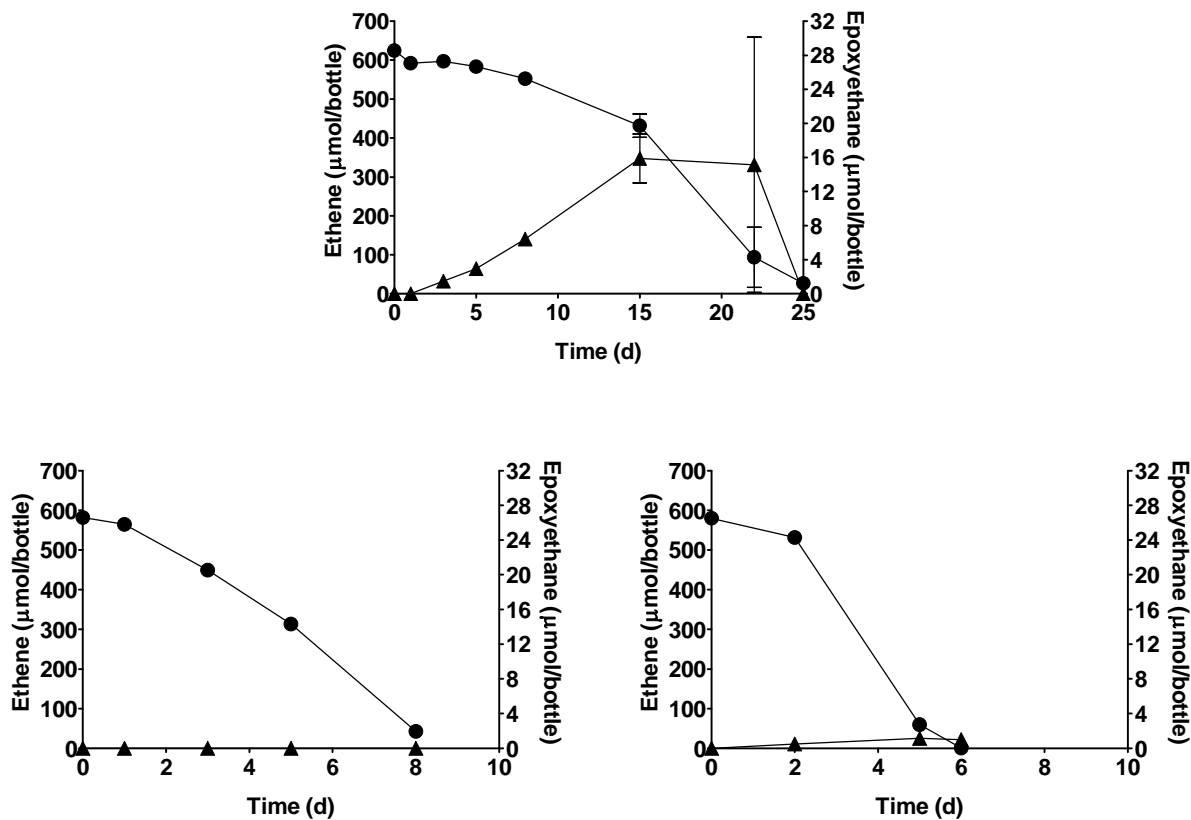

Figure S2: Ethene (●) biodegradation and epoxyethane (▲) accumulation in recombinant JS623 strains A) JS623(pMV<sub>etnE</sub>), B) JS623(pMV<sub>etnE1</sub>), and C) JS623(pMV<sub>etnE2</sub>). The data points are the averages from analysis of three replicate bottles and the error bars are the standard deviation. In some cases, the error bars are smaller than the symbols. The behavior of JS623(pMV<sub>etnE1</sub>) JS623(pMV<sub>etnE2</sub>) cultures was confirmed in at least two independent experiments.

## References

1. **Coleman, N. V., and J. C. Spain.** 2003. Distribution of the coenzyme M pathway of epoxide metabolism among ethene- and vinyl chloride-degrading *Mycobacterium* strains. *Appl. Environ. Microbiol.* **69**:6041-6046.
2. **Mattes, T. E., N. V. Coleman, J. C. Spain, and J. M. Gossett.** 2005. Physiological and molecular genetic analyses of vinyl chloride and ethene biodegradation in *Nocardioides* sp. strain JS614. *Arch. Microbiol.* **183**:95-106.
